# Supplementary material for: Accelerometer-Measured Diurnal Patterns of Sedentary Behavior among Japanese Workers: A Descriptive Epidemiological Study
Source: MDPI journal article supplement (doi:10.3390/ijerph17113814), 2020-05-27
Supplement: s1 [file s1]

Supplementary Table. Characteristics of objectively measured sedentary behavior and physical activity

|                     | Workdays |      | Non-workdays |      |
|---------------------|----------|------|--------------|------|
|                     | Mean     | SD   | Mean         | SD   |
| Accelerometer data  |          |      |              |      |
| Wear time (minutes) |          |      |              |      |
| Morning             | 307.5    | 44.9 | 261.5        | 62.9 |
| Afternoon           | 355.2    | 15.1 | 344.8        | 33.4 |
| Evening             | 274.3    | 52.8 | 274.2        | 62.8 |
| SB (minutes)        |          |      |              |      |
| Morning             | 146.6    | 58.6 | 135.2        | 50.3 |
| Afternoon           | 192.5    | 71.0 | 191.6        | 60.7 |
| Evening             | 168.2    | 48.3 | 183.9        | 58.9 |
| LPA (minutes)       |          |      |              |      |
| Morning             | 129.4    | 57.2 | 105.3        | 49.5 |
| Afternoon           | 134.9    | 59.2 | 128.3        | 52.3 |
| Evening             | 88.0     | 35.6 | 79.6         | 39.1 |
| MVPA (minutes)      |          |      |              |      |
| Morning             | 31.5     | 23.2 | 21.1         | 18.9 |
| Afternoon           | 27.8     | 22.6 | 24.9         | 19.2 |
| Evening             | 18.1     | 13.8 | 10.7         | 10.2 |

LPA, light-intensity physical activity; MVPA, moderate-to-vigorous intensity physical activity; SB, sedentary behavior; SD, standard deviation.
